# Supplementary material for: Myocardial cathepsin D is downregulated in sudden cardiac death
Source: PubMed Central journal article supplement (PMC7075574; doi:10.1371/journal.pone.0230375), 2020-03-16
Supplement: pone.0230375.s001.pdf [file pone.0230375.s001.pdf]

## S1Table.

Characteristics of individual subjects.

| ID    | Cause of death     | Age(y) | Sex | Postmortem interval (day) | BMI (kg/m <sup>2</sup> ) | Heart weight (g) | Coronary atherosclerosis |
|-------|--------------------|--------|-----|---------------------------|--------------------------|------------------|--------------------------|
| SCH1  | Hypertensive HF    | 74     | M   | 2.2                       | 26.0                     | 407              | None                     |
| SCH2  | Hypertensive HF    | 80     | M   | 2.0                       | 19.3                     | 494              | None                     |
| SCH3  | Ischemic HF        | 65     | F   | 1.4                       | 21.1                     | 404              | Severe                   |
| SCH4  | Ischemic HF        | 45     | F   | 2.0                       | 20.0                     | 477              | Severe                   |
| SCH5  | Ischemic HF        | 54     | M   | 0.8                       | 23.9                     | 560              | Severe                   |
| SCH6  | Ischemic HF        | 48     | M   | 2.6                       | 23.8                     | 408              | Severe                   |
| SCH7  | Ischemic HF        | 41     | M   | 1.7                       | 27.9                     | 425              | Severe                   |
| SCH8  | Ischemic HF        | 85     | M   | 2.1                       | 26.2                     | 450              | Severe                   |
| SCH9  | Hypertensive HF    | 66     | M   | 6.8                       | 34.5                     | 596              | Little                   |
| SCH10 | Hypertensive HF    | 42     | M   | 1.6                       | 49.8                     | 1104             | Little                   |
| SCH11 | Aortic stenosis    | 82     | M   | 3.4                       | 25.6                     | 758              | Little                   |
| CCH1  | Accident           | 71     | M   | 1.9                       | 26.6                     | 550              | Mild                     |
| CCH2  | Accident           | 64     | M   | 2.0                       | 26.1                     | 413              | Little                   |
| CCH3  | Accident           | 70     | M   | 1.8                       | 22.4                     | 448              | Mild                     |
| CCH4  | Accident           | 43     | M   | 3.5                       | 28.4                     | 497              | None                     |
| CCH5  | Accident           | 73     | M   | 2.9                       | 24.0                     | 545              | Little                   |
| CCH6  | Accident           | 70     | F   | 2.6                       | 20.0                     | 481              | Little                   |
| CCH7  | Accident           | 86     | F   | 2.5                       | 20.6                     | 516              | Little                   |
| CCH8  | Accident           | 34     | M   | 4.5                       | 28.1                     | 456              | Little                   |
| CCH9  | Putamen hemorrhage | 43     | M   | 3.8                       | 23.5                     | 467              | None                     |
| CCH10 | Accident           | 31     | M   | 4.0                       | 27.2                     | 450              | Little                   |
| Con1  | Accident           | 44     | M   | 0.9                       | 22.3                     | 374              | None                     |
| Con2  | Pneumonia          | 65     | F   | 1.2                       | 14.7                     | 218              | None                     |
| Con3  | Alcohol cirrhosis  | 49     | M   | 1.2                       | 18.9                     | 270              | None                     |
| Con4  | Accident           | 60     | M   | 4.5                       | 21.9                     | 361              | Little                   |
| Con5  | Accident           | 58     | M   | 2.1                       | 23.8                     | 331              | None                     |
| Con6  | Accident           | 53     | M   | 3.5                       | 25.3                     | 383              | None                     |
| Con7  | Accident           | 36     | M   | 4.4                       | 20.6                     | 354              | None                     |
| Con8  | Accident           | 35     | M   | 3.2                       | 25.4                     | 339              | None                     |
| Con9  | Accident           | 23     | M   | 5.0                       | 17.5                     | 306              | None                     |
| Con10 | Accident           | 27     | M   | 1.8                       | 24.3                     | 369              | None                     |
| Con11 | Aortic dissection  | 81     | M   | 3.3                       | 20.2                     | 380              | Mild                     |
| Con12 | Accident           | 88     | F   | 2.2                       | 18.1                     | 259              | Little                   |
| Con13 | Accident           | 22     | M   | 6.7                       | 19.7                     | 247              | None                     |
| Con14 | Accident           | 17     | F   | 1.8                       | 18.5                     | 166              | None                     |
| Con15 | Accident           | 74     | F   | 6.4                       | 20.1                     | 254              | Little                   |
| Con16 | Accident           | 71     | F   | 4.5                       | 18.5                     | 352              | Little                   |
| Con17 | Accident           | 51     | M   | 5.4                       | 20.7                     | 366              | None                     |
