# Supplementary material for: Myocardial cathepsin D is downregulated in sudden cardiac death
Source: PubMed Central journal article supplement (PMC7075574; doi:10.1371/journal.pone.0230375), 2020-03-16

**S1 Fig.**

Capillary immunoblotting of cardiac CT SB and GAPDH. Exposure was set automatically with the Wes system. Con13, Con8, CCH4, Con6, Con4, CCH3, and CCH7 were as represented in Fig 1a.

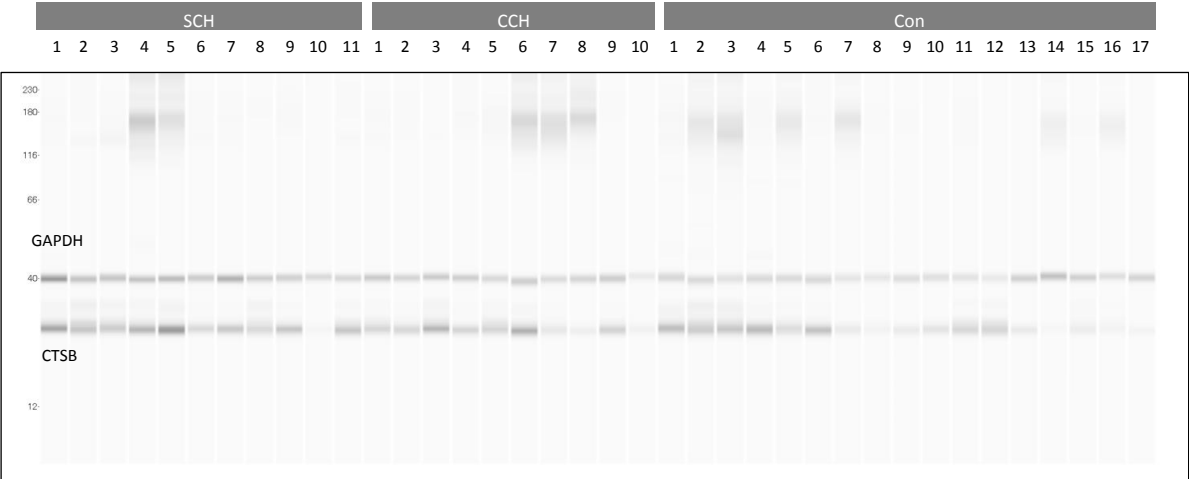

Supplement: pone.0230375.s002.pdf [file pone.0230375.s002.pdf]
