# Supplementary material for: Myocardial cathepsin D is downregulated in sudden cardiac death
Source: PubMed Central journal article supplement (PMC7075574; doi:10.1371/journal.pone.0230375), 2020-03-16

**S4 Fig.**

Capillary immunoblotting of cardiac p62 and GAPDH. Exposure was set automatically with the Wes system. Con13, Con8, CCH4, Con6, Con4, CCH3, and CCH7 were as represented in Fig 1d.

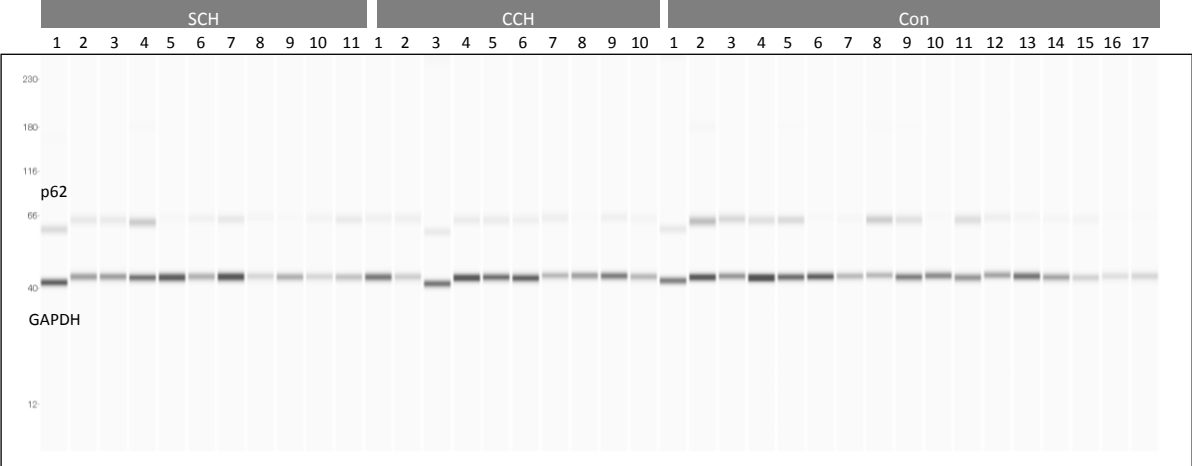

Supplement: pone.0230375.s005.pdf [file pone.0230375.s005.pdf]
