# Supplementary material for: Myocardial cathepsin D is downregulated in sudden cardiac death
Source: PubMed Central journal article supplement (PMC7075574; doi:10.1371/journal.pone.0230375), 2020-03-16

### S5 Fig.

Immunoblotting of cardiac ATPSC and GAPDH. A membrane was cut at around 25 kDa and independently stained with the primary antibody. Exposure time was set at 30 s for ATPSC detection, and 10s for GAPDH detection. Dashed lines indicate cropped immunoblots presented in Fig 1e.

#### WB1

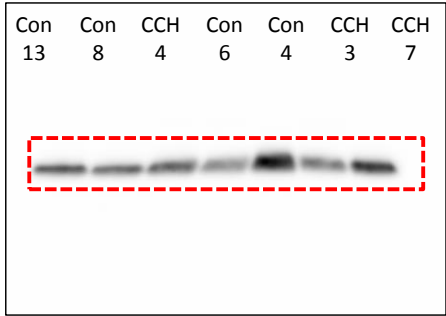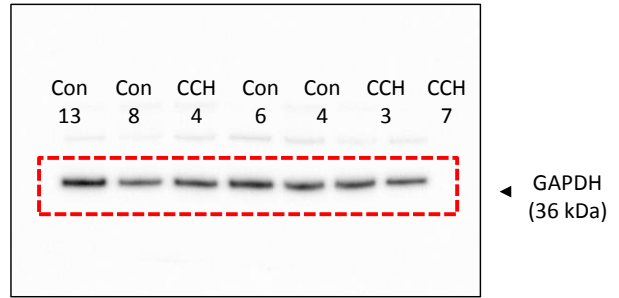

#### WB2

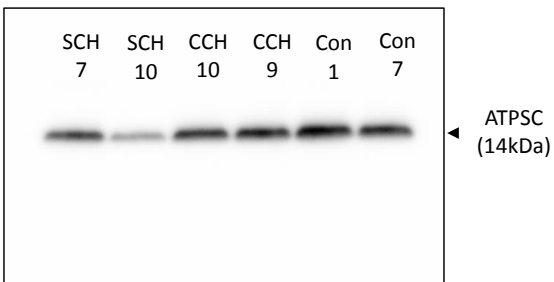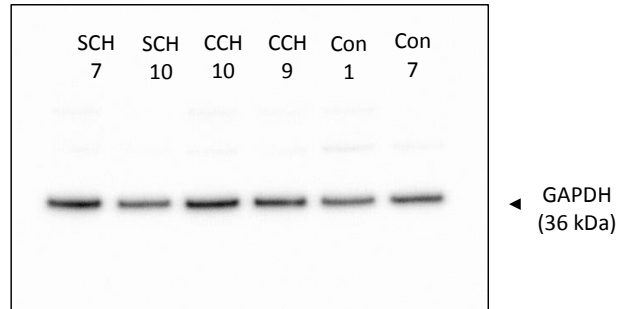

#### WB3

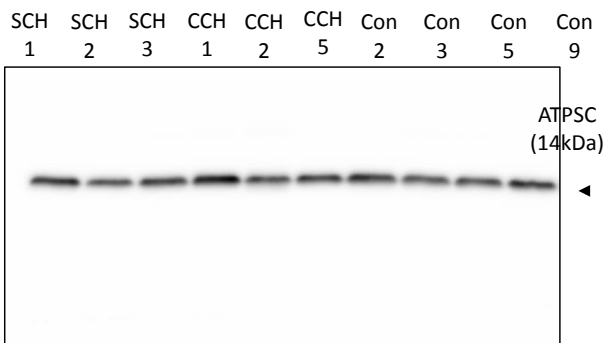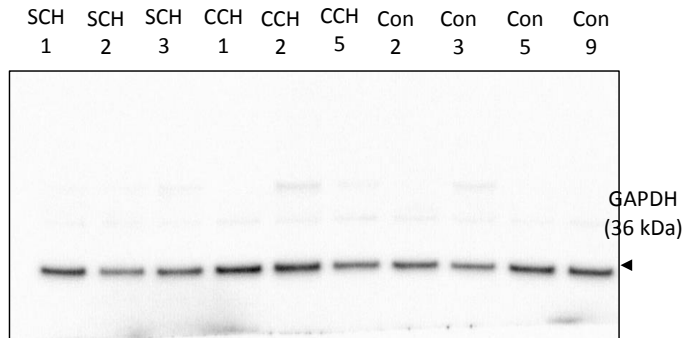

## WB4

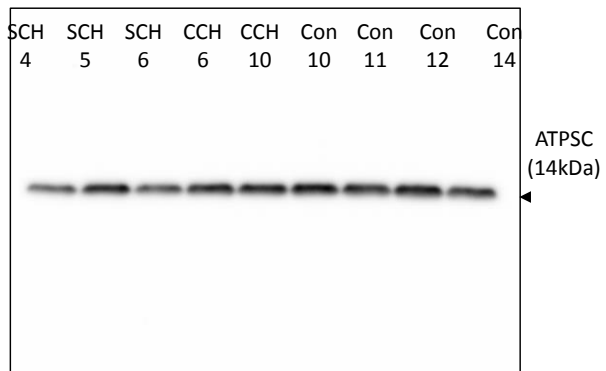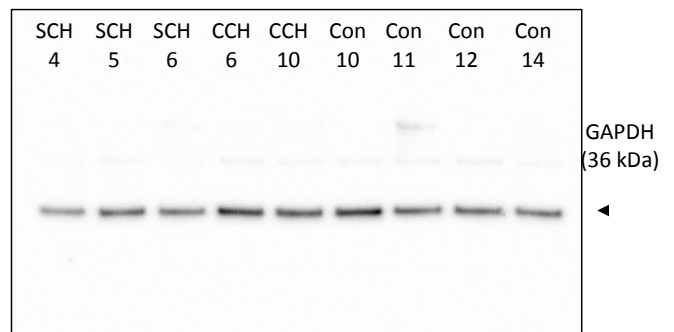

## WB5

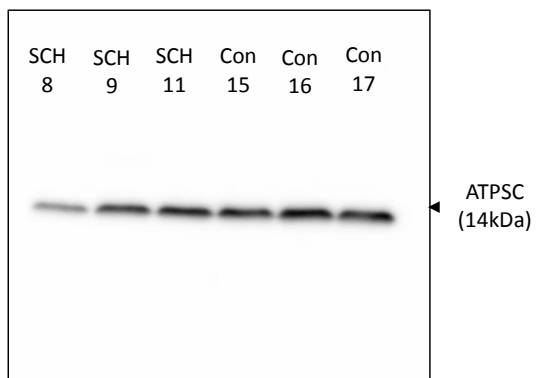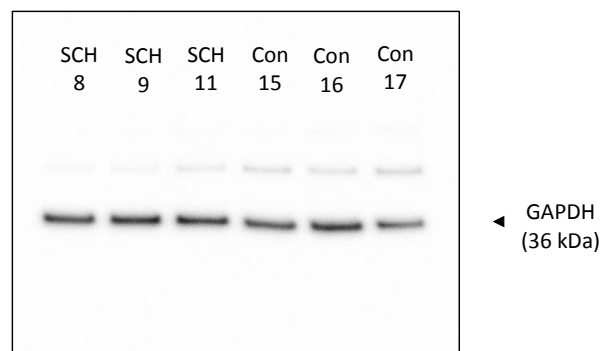

Supplement: pone.0230375.s006.pdf [file pone.0230375.s006.pdf]
